# Supplementary material
Source: PubMed Central journal article supplement (PMC9994773)
Supplement: 43450_2023_381_MOESM1_ESM.pdf [file 43450_2023_381_MOESM1_ESM.pdf]

# **(R)- (+)-Rosmarinic Acid as an Inhibitor of Herpes and Dengue Viruses Replication: An *In-silico* Assessment**

**Christy Rani Arokia Samy<sup>1</sup>, Kalaimathi Karunanithi<sup>2</sup>, Jayasree Sheshadhri<sup>3</sup>, R. Murugesan  
Rengarajan<sup>4</sup>, Prabhu Srinivasan<sup>\*5</sup>,  
Pinkie Cherian<sup>6</sup>**

<sup>1</sup>Department of Chemistry, Thiru. Vi. Ka. Government Arts College, Kidaramkondan, Thiruvarur, Tamil Nadu, India-610 003.

<sup>2</sup>Department of Chemistry, Government College of Engineering, Sengipatti, Thanjavur, Tamil Nadu, India-613 402

<sup>3</sup>Department of Chemistry, Prince Shri Venkateshwara Padmavathy Engineering College, Ponmar, Chennai India-600 127

<sup>4</sup>Department of Zoology, Annai Vailankanni Arts and Science College, (Bishop Sundaram Campus), Thanjavur, Tamil Nadu, India-613 007.

<sup>5</sup>Department of Botany, Annai Vailankanni Arts and Science College, (Bishop Sundaram Campus), Thanjavur, Tamil Nadu, India-613 007.

<sup>6</sup>Department of Botany, St Joseph's College for Women, Alappuzha, Kerala, India

## **Corresponding author**

S. Prabhu

prabhu@avasctnj.edu.in

## **ORCID**

**Christy Rani Arokia Samy** : <https://orcid.org/0000-0002-7846-5540>

**Kalaimathi Karunanithi** : <https://orcid.org/0000-0002-9533-3574>

**Jayasree Sheshadhri** : <https://orcid.org/0000-0001-6092-254X>

**Murugesan Rengarajan** : <https://orcid.org/0000-0002-0755-3658>

**Prabhu Srinivasan** : <https://orcid.org/0000-0001-5839-0345>

**Pinkie Cherian** : <https://orcid.org/0000-0001-6795-2792>

**Table. S1.** Site scores and volumes of viral protein binding sites.

| S. No. | Target Code | Score | Volume  | Active residues of Site within 3Å                                                                                                                                  |
|--------|-------------|-------|---------|--------------------------------------------------------------------------------------------------------------------------------------------------------------------|
| 1.     | 1F5Q        | 1.015 | 287.777 | LYS89, ASP86, GLN85, HIE84, LEU83, PHE82, GLU81, PHE80, LEU143, ALA144, ASP145, PHE146, GLY147, GLU51, LYS33, LEU32, ALA31, LEU134, GLN131, VAL64, ILE64 and LEU55 |
| 2.     | 2J7W        | 1.049 | 493.92  | PRO319, THR317, PRO258, ASN207, ARG257, LYS211, ALA213, ASP276, PHE277 and ASP278                                                                                  |
| 3.     | 4OIG        | 1.032 | 364.251 | ARG481, VAL450, THR571, LYS575, VAL577, VAL579, VAL358, LYS355, PHE354, TYR299, TRP302, ILE592, GLN602, SER600 and GLY599                                          |

**Table. S2.** Binding affinities among the residues of viral proteins and (*R*)- (+)-rosmarinic acid

| Docked complex | Residues contribution for interactions                        | Interactions                                                                  |                                                               |
|----------------|---------------------------------------------------------------|-------------------------------------------------------------------------------|---------------------------------------------------------------|
|                |                                                               | Back bone with H-bond distances                                               | Other contacts                                                |
| 1F5Q with RA   | PHE146, GLU51 (Covalent binding), LYS33, PHE80, LEU83 & HIE84 | PHE146 (2.14), GLU51 (1.47 & 2.06), LYS33 (1.70), LEU83 (2.13) & HIE84 (2.14) | PHE80 ( $\pi$ - $\pi$ )                                       |
| 2J7W with RA   | THR571, VAL450, PHE354 & SER600                               | THR571 (2.28), VAL450 (2.10), PHE354 (1.71) & SER600 (2.54)                   | -                                                             |
| 4OIG with RA   | THR317 (Covalent binding), ARG257, LYS211, PHE277 & ASP278    | THR317 (1.96 & 1.92), ARG257 (1.94), PHE277 (2.76) & ASP278 (1.92)            | LYS211 (Salt bridge & $\pi$ -cation) and ARG257 (Salt bridge) |

**Table. S3.** The biomedical drug probabilities of (*R*)- (+)-rosmarinic acid by triggering or inhibiting the enzymes in human body (Predicted by Pass server)

| <b>Biological activities</b>                   | <b>Pa (probability to be active)</b> | <b>Pi (probability to be inactive)</b> |
|------------------------------------------------|--------------------------------------|----------------------------------------|
| Membrane integrity agonist                     | 0.956                                | 0.003                                  |
| Feruloyl esterase inhibitor                    | 0.938                                | 0.003                                  |
| Antihypoxic                                    | 0.921                                | 0.002                                  |
| Monophenol monooxygenase inhibitor             | 0.836                                | 0.003                                  |
| Antidiabetic                                   | 0.799                                | 0.005                                  |
| CYP2J substrate                                | 0.804                                | 0.020                                  |
| GST A substrate                                | 0.787                                | 0.011                                  |
| Reductant                                      | 0.779                                | 0.004                                  |
| Membrane permeability inhibitor                | 0.785                                | 0.012                                  |
| Pyruvate decarboxylase inhibitor               | 0.766                                | 0.004                                  |
| Preneoplastic conditions treatment             | 0.763                                | 0.005                                  |
| Chlordecone reductase inhibitor                | 0.780                                | 0.024                                  |
| Mucomembranous protector                       | 0.779                                | 0.024                                  |
| Linoleate diol synthase inhibitor              | 0.757                                | 0.008                                  |
| APOA1 expression enhancer                      | 0.751                                | 0.004                                  |
| Free radical scavenger                         | 0.745                                | 0.003                                  |
| TNF expression inhibitor                       | 0.744                                | 0.005                                  |
| 4-Hydroxybenzoate 3-monooxygenase inhibitor    | 0.735                                | 0.002                                  |
| JAK2 expression inhibitor                      | 0.745                                | 0.013                                  |
| MMP9 expression inhibitor                      | 0.730                                | 0.005                                  |
| Anti-mutagenic                                 | 0.722                                | 0.005                                  |
| Lipid peroxidase inhibitor                     | 0.719                                | 0.005                                  |
| Mucositis treatment                            | 0.725                                | 0.021                                  |
| Ubiquinol-cytochrome-c reductase inhibitor     | 0.752                                | 0.049                                  |
| 4-Coumarate-CoA ligase inhibitor               | 0.705                                | 0.003                                  |
| Gluconate 2-dehydrogenase (acceptor) inhibitor | 0.710                                | 0.051                                  |
| Membrane integrity agonist                     | 0.956                                | 0.003                                  |
| Feruloyl esterase inhibitor                    | 0.938                                | 0.003                                  |
| Antihypoxic                                    | 0.921                                | 0.002                                  |
| Monophenol monooxygenase inhibitor             | 0.836                                | 0.003                                  |
| Antidiabetic                                   | 0.799                                | 0.005                                  |
| CYP2J substrate                                | 0.804                                | 0.020                                  |

**Table. S4.** Adverse effect of Aciclovir predicted by Pass Server

| <b>Adverse Effects</b> | <b>Pa (probability to be active)</b> | <b>Pi (probability to be inactive)</b> |
|------------------------|--------------------------------------|----------------------------------------|
|------------------------|--------------------------------------|----------------------------------------|

|                              |       |       |
|------------------------------|-------|-------|
| Pure red cell aplasia        | 0.986 | 0.001 |
| Coma                         | 0.986 | 0.003 |
| Ataxia                       | 0.974 | 0.004 |
| Acidosis                     | 0.973 | 0.003 |
| Dysarthria                   | 0.968 | 0.002 |
| Splenomegaly                 | 0.934 | 0.001 |
| Myoclonus                    | 0.933 | 0.003 |
| Anemia                       | 0.931 | 0.005 |
| Consciousness alteration     | 0.929 | 0.006 |
| Hyperthermic                 | 0.926 | 0.004 |
| Hepatitis                    | 0.927 | 0.005 |
| Diarrhea                     | 0.926 | 0.008 |
| Tremor                       | 0.921 | 0.005 |
| Thrombocytopenia             | 0.909 | 0.005 |
| Stomatitis                   | 0.910 | 0.009 |
| Xerostomia                   | 0.905 | 0.008 |
| Leukopenia                   | 0.901 | 0.005 |
| Tachycardiac                 | 0.902 | 0.006 |
| Headache                     | 0.902 | 0.008 |
| Drowsiness                   | 0.892 | 0.010 |
| Paralysis                    | 0.885 | 0.005 |
| Depression                   | 0.873 | 0.005 |
| Dizziness                    | 0.879 | 0.011 |
| Sensory disturbance          | 0.873 | 0.012 |
| Emetic                       | 0.871 | 0.011 |
| Hematotoxic                  | 0.874 | 0.015 |
| Pain                         | 0.867 | 0.010 |
| Agranulocytosis              | 0.864 | 0.008 |
| Dermatitis                   | 0.865 | 0.012 |
| Sweating                     | 0.856 | 0.010 |
| Nausea                       | 0.854 | 0.015 |
| Nephrotoxic                  | 0.838 | 0.008 |
| Excitability                 | 0.839 | 0.011 |
| Dyskinesia                   | 0.838 | 0.011 |
| Toxic. gastrointestinal      | 0.844 | 0.019 |
| Sleep disturbance            | 0.841 | 0.018 |
| Thrombophlebitis             | 0.830 | 0.007 |
| Conjunctivitis               | 0.837 | 0.018 |
| Neurotoxic                   | 0.811 | 0.016 |
| Hypertensive                 | 0.802 | 0.015 |
| Gastrointestinal disturbance | 0.779 | 0.008 |
| Ocular toxicity              | 0.784 | 0.024 |
| Inflammation                 | 0.761 | 0.019 |
| Reproductive dysfunction     | 0.764 | 0.024 |
| Bronchoconstrictor           | 0.749 | 0.011 |
| Hepatotoxic                  | 0.758 | 0.026 |
| Allergic contact dermatitis  | 0.721 | 0.017 |
| Glaucoma                     | 0.702 | 0.005 |
| Behavioral disturbance       | 0.716 | 0.037 |

**Table. S5.** Adverse effect of Famiciclovir predicted by Pass Server

| <b>Adverse Effects</b> | <b>Pa (probability to be active)</b> | <b>Pi (probability to be inactive)</b> |
|------------------------|--------------------------------------|----------------------------------------|
|------------------------|--------------------------------------|----------------------------------------|

|                       |       |       |
|-----------------------|-------|-------|
| Pure red cell aplasia | 0.824 | 0.019 |
| Splenomegaly          | 0.767 | 0.010 |

**Table. S6.** Adverse effect of Famiciclovir predicted by Pass Server

| <b>Adverse Effects</b>   | <b>Pa (probability to be active)</b> | <b>Pi (probability to be inactive)</b> |
|--------------------------|--------------------------------------|----------------------------------------|
| Coma                     | 0.940                                | 0.004                                  |
| Headache                 | 0.926                                | 0.006                                  |
| Pure red cell aplasia    | 0.919                                | 0.004                                  |
| Myoclonus                | 0.911                                | 0.003                                  |
| Dizziness                | 0.914                                | 0.008                                  |
| Thrombocytopenia         | 0.908                                | 0.005                                  |
| Drowsiness               | 0.910                                | 0.009                                  |
| Leukopenia               | 0.904                                | 0.005                                  |
| Splenomegaly             | 0.898                                | 0.002                                  |
| Agranulocytosis          | 0.894                                | 0.005                                  |
| Pain                     | 0.897                                | 0.008                                  |
| Sensory disturbance      | 0.893                                | 0.010                                  |
| Dermatitis               | 0.884                                | 0.009                                  |
| Nausea                   | 0.885                                | 0.011                                  |
| Sleep disturbance        | 0.878                                | 0.014                                  |
| Hematotoxic              | 0.867                                | 0.016                                  |
| Excitability             | 0.858                                | 0.009                                  |
| Xerostomia               | 0.858                                | 0.011                                  |
| Ataxia                   | 0.854                                | 0.008                                  |
| Emetic                   | 0.859                                | 0.013                                  |
| Toxic. gastrointestinal  | 0.850                                | 0.018                                  |
| Sweating                 | 0.837                                | 0.013                                  |
| Nephrotoxic              | 0.812                                | 0.011                                  |
| Consciousness alteration | 0.810                                | 0.015                                  |
| Dysarthria               | 0.784                                | 0.008                                  |
| Behavioral disturbance   | 0.795                                | 0.025                                  |
| Stomatitis               | 0.777                                | 0.020                                  |
| Tremor                   | 0.759                                | 0.015                                  |
| Acidosis                 | 0.753                                | 0.023                                  |
| Depression               | 0.727                                | 0.014                                  |
| Delirium                 | 0.728                                | 0.018                                  |
| Thrombophlebitis         | 0.702                                | 0.020                                  |
| Diarrhea                 | 0.716                                | 0.036                                  |

**Table. S7.** Adverse effect of Valaciclovir predicted by Pass Server

| <b>Adverse Effects</b> | <b>Pa (probability to be active)</b> | <b>Pi (probability to be inactive)</b> |
|------------------------|--------------------------------------|----------------------------------------|
|------------------------|--------------------------------------|----------------------------------------|

---

|                              |       |       |
|------------------------------|-------|-------|
| Coma                         | 0.986 | 0.003 |
| Pure red cell aplasia        | 0.982 | 0.001 |
| Ataxia                       | 0.976 | 0.004 |
| Toxic. respiration           | 0.977 | 0.005 |
| Splenomegaly                 | 0.964 | 0.001 |
| Delirium                     | 0.955 | 0.003 |
| Myoclonus                    | 0.950 | 0.002 |
| Tremor                       | 0.951 | 0.004 |
| Hepatitis                    | 0.949 | 0.004 |
| Consciousness alteration     | 0.938 | 0.005 |
| Thrombocytopenia             | 0.926 | 0.005 |
| Acidosis                     | 0.924 | 0.007 |
| Leukopenia                   | 0.911 | 0.005 |
| Drowsiness                   | 0.913 | 0.008 |
| Headache                     | 0.910 | 0.007 |
| Stomatitis                   | 0.911 | 0.009 |
| Dysarthria                   | 0.904 | 0.003 |
| Agranulocytosis              | 0.898 | 0.004 |
| Dizziness                    | 0.895 | 0.010 |
| Emetic                       | 0.891 | 0.009 |
| Sweating                     | 0.887 | 0.007 |
| Sensory disturbance          | 0.889 | 0.010 |
| Necrosis                     | 0.886 | 0.008 |
| Anemia                       | 0.881 | 0.008 |
| Nausea                       | 0.881 | 0.011 |
| Gastrointestinal disturbance | 0.873 | 0.005 |
| Allergic dermatitis          | 0.869 | 0.004 |
| Hematotoxic                  | 0.873 | 0.015 |
| Dermatitis                   | 0.869 | 0.012 |
| Dyskinesia                   | 0.859 | 0.010 |
| Toxic. gastrointestinal      | 0.863 | 0.016 |
| Nephrotoxic                  | 0.854 | 0.007 |
| Neurotoxic                   | 0.856 | 0.011 |
| Inflammation                 | 0.851 | 0.010 |
| Tachycardiac                 | 0.830 | 0.013 |
| Hypotension                  | 0.819 | 0.013 |
| Xerostomia                   | 0.806 | 0.016 |
| Thrombophlebitis             | 0.798 | 0.009 |
| Diarrhea                     | 0.802 | 0.025 |
| Ocular toxicity              | 0.799 | 0.022 |
| Hypertensive                 | 0.792 | 0.016 |
| Behavioral disturbance       | 0.788 | 0.026 |
| Hyperthermic                 | 0.772 | 0.011 |
| Hepatotoxic                  | 0.772 | 0.024 |
| Excitability                 | 0.738 | 0.024 |
| Conjunctivitis               | 0.742 | 0.029 |
| Glaucoma                     | 0.709 | 0.005 |
| Paralysis                    | 0.706 | 0.018 |
| Bronchoconstrictor           | 0.703 | 0.017 |

---

**Table. S8.** Adverse effect of (*R*)-(+)-rosmarinic acid predicted by Pass Server

| Adverse Effects     | Pa (probability to be active) | Pi (probability to be inactive) |
|---------------------|-------------------------------|---------------------------------|
| Hematemesis         | 0.797                         | 0.014                           |
| Urine discoloration | 0.739                         | 0.015                           |
| Shivering           | 0.748                         | 0.059                           |
| Ulcer, aphthous     | 0.707                         | 0.041                           |

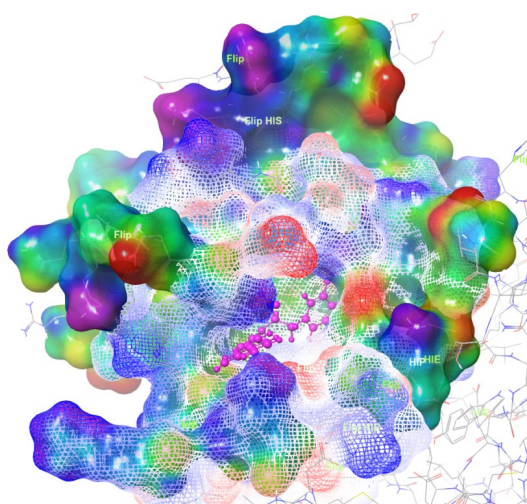

**Fig. S1.** Binding Site of (*R*)-(+)-rosmarinic acid in 1F5Q

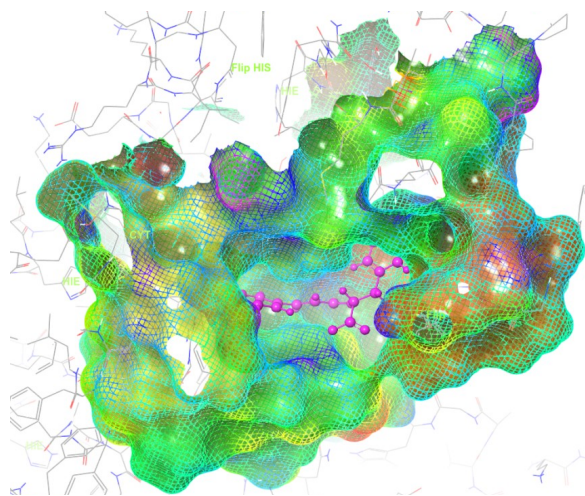

**Fig. S2.** Binding Site of (*R*)-(+)-rosmarinic acid in 2J7W

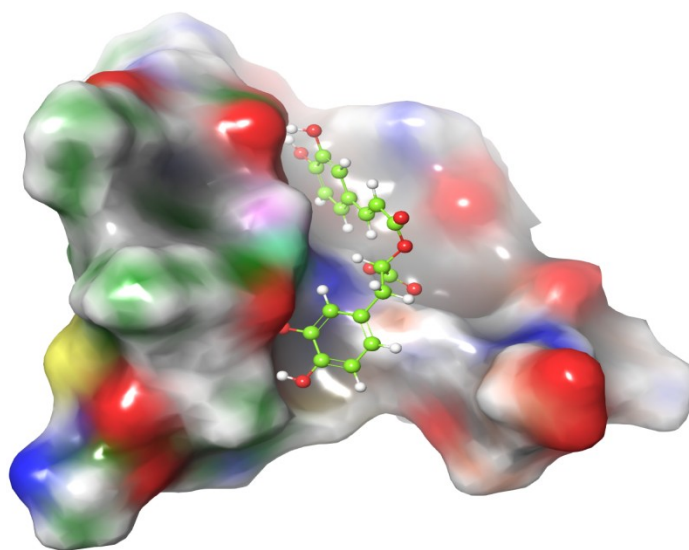

**Fig. S3.** Binding Site of (*R*)-(+)-rosmarinic acid in 4OIG



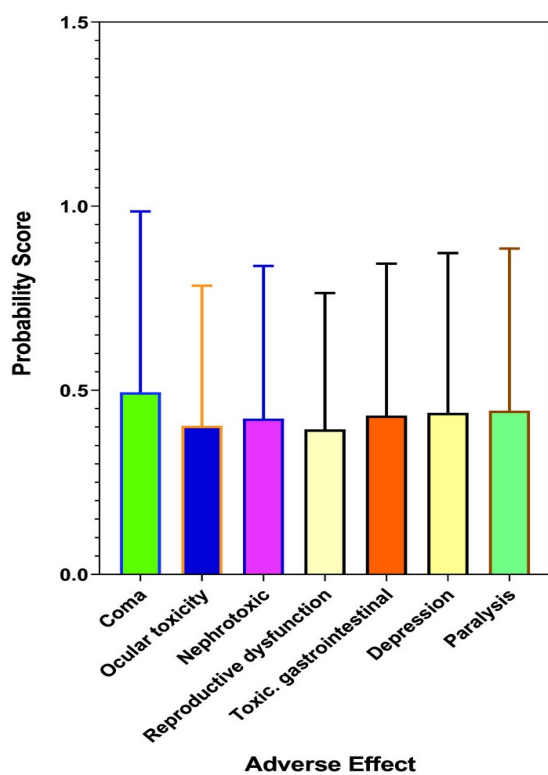

**Fig. S4.** Probability scores reflect the most notable adverse effect of the acyclovir in the human health (Predicted by Pass Server)

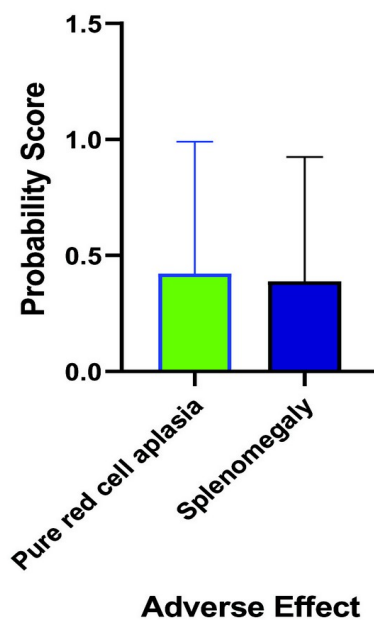

**Fig. S5** Probability scores reflect the most notable adverse effect of the Famiciclovir in the human health (Predicted by Pass Server)

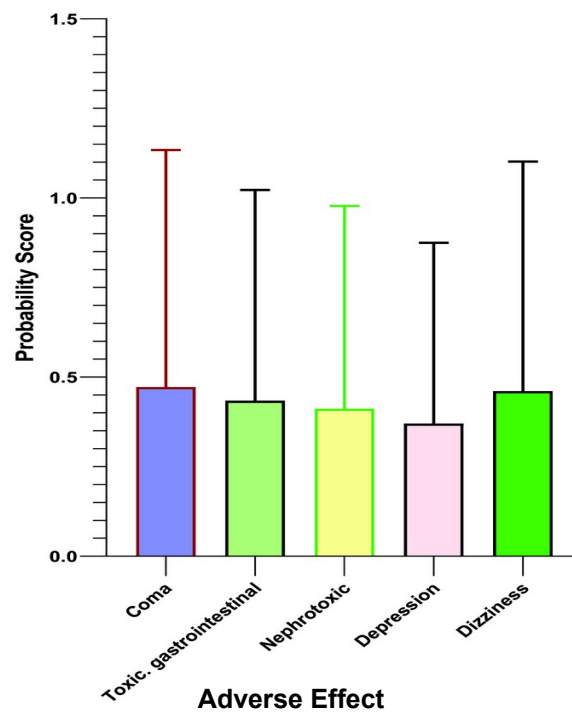

**Fig. S6** Probability scores reflect the most notable adverse effect of the Penciclovir in the human health (Predicted by Pass Server)
